# Supplementary material
Source: HighWire-hosted journal article supplement (https://drc.bmj.com/content/11/3/e003224)
Supplement: inline-supplementary-material-2 [file inline-supplementary-material-2.pdf]

**Reflexivity Statement**

| Domain                                         | Question                                                                                                                 | Response                                                                                                                                                                                                                                                                                                 |
|------------------------------------------------|--------------------------------------------------------------------------------------------------------------------------|----------------------------------------------------------------------------------------------------------------------------------------------------------------------------------------------------------------------------------------------------------------------------------------------------------|
| Study conceptualization                        | 1. How does this study address local research and policy priorities?                                                     | The relationship between diabetes and socioeconomic factors, such as housing factors, is well established and remains a clear research priority to support policy planning in low-middle income countries. This has been evidenced by the interest that local partners have had in supporting this work. |
|                                                | 2. How were local researchers involved in study design?                                                                  | The study design was developed collaboratively between Brazilian and UK researchers at face-to-face and virtual meetings.                                                                                                                                                                                |
| Research management                            | 3. How has funding been used to support the local research team?                                                         | Funding supported data safeguarding, processing, and analysis performed by Brazilian researchers.                                                                                                                                                                                                        |
| Data acquisition and analysis                  | 4. How are research staff who conducted data collection acknowledged?                                                    | We acknowledged in the manuscript the Brazilian Ministry of Health, Ministry of Citizenship, and Ministry of Cities for providing the data, and the data production team of CIDACS-FIOCRUZ for supporting with data linkage.                                                                             |
|                                                | 5. How have members of the research partnership been provided with access to study data?                                 | Study data has been made available to all researchers upon request and obtaining the security credentials from CIDACS-FIOCRUZ.                                                                                                                                                                           |
|                                                | 6. How were data used to develop analytical skills within the partnership?                                               | The data have been used for several studies at CIDACS-FIOCRUZ, contributing to the development of analytical skills of early career researchers.                                                                                                                                                         |
| Data interpretation                            | 7. How have research partners collaborated in interpreting study data?                                                   | All authors met regularly to discuss the findings of this and other works.                                                                                                                                                                                                                               |
| Drafting and revising for intellectual content | 8. How were research partners supported to develop writing skills?                                                       | RFO, the first author, wrote the first draft and all authors then contributed to the drafting and revision of the manuscript.                                                                                                                                                                            |
|                                                | 9. How will research products be shared to address local needs?                                                          | Meetings and institutional communication actions are planned to disseminate the research locally.                                                                                                                                                                                                        |
| Authorship                                     | 10. How is the leadership, contribution and ownership of this work by LMIC researchers recognised within the authorship? | Most of the authors are Brazilian, including the first author. The contributions of Brazilian researchers were recognised in the study.                                                                                                                                                                  |
|                                                | 11. How have early career researchers across the partnership been included within the authorship team?                   | RFO, AJFF, CT, JP, and JFO are early career researchers.                                                                                                                                                                                                                                                 |
|                                                | 12. How has gender balance been addressed within the authorship?                                                         | 9 authors are men and 10 are women.                                                                                                                                                                                                                                                                      |

|                |                                                                                                 |                                                                                                                                                                                    |
|----------------|-------------------------------------------------------------------------------------------------|------------------------------------------------------------------------------------------------------------------------------------------------------------------------------------|
| Training       | 13. How has the project contributed to training of LMIC researchers?                            | The project included early career researchers who were trained to develop different research skills, including analysis and writing skills.                                        |
| Infrastructure | 14. How has the project contributed to improvements in local infrastructure?                    | The support from this project contributed to training of early career researchers and to improving CIDACS-FIOCRUZ data structures.                                                 |
|                | 15. What safeguarding procedures were used to protect local study participants and researchers? | The data analysed is stored at CIDACS-FIOCRUZ under strict security standards. Analyses were performed on de-identified data in a trusted research environment with access by VPN. |
